# Supplementary material
Source: publisher figshare collection journal article supplement (https://tandf.figshare.com/articles/dataset/_/23798865)
Supplement: Supplementary file 1 [file 1]

**Supplementary Table** **1**. pCMV-*IL-12*-DNA nanocomplex formation

| **Components** | **Ratios** | | | | | | | | |
| --- | --- | --- | --- | --- | --- | --- | --- | --- | --- |
| **1:0** | **1:0.5** | **1:1** | **1:1.5** | **1:2** | **1:2.5** | **1:3** | **1:3.5** |
| pCMV-*IL-12*-DNA (µL)  (µg/µL) | 1.00  (0.30) | 1.00  (0.30) | 1.00  (0.30) | 1.00  (0.30) | 1.00  (0.30) | 1.00  (0.30) | 1.00  (0.30) | 1.00  (0.30) |
| *AuNP-PLL (µL)  (µg/µL) | 0  (0) | 1.50  (0.15) | 3.00  (0.30) | 4.50  (0.45) | 6.00 (0.60) | 7.50  (0.75) | 9.00 (0.90) | 10.50  (1.05) |
| *AuNP-PLL-PEG (µL)  (µg/µL) | 0  (0) | 1.50  (0.15) | 3.00  (0.30) | 4.50  (0.45) | 6.00 (0.60) | 7.50  (0.75) | 9.00 (0.90) | 10.50  (1.05) |

Functionalized NPs diluted to a concentration of *0.1001 µg/µL
